# Supplementary material
Source: MDPI journal article supplement (https://www.mdpi.com/2624-5175/4/4/52)
Supplement: s1 [file s1]

## **Appendix. Search terms used in the current systematic review**

### **Embase.com**

(sleep/de OR 'night sleep'/exp OR 'sleep debt'/exp OR 'sleep pattern'/exp OR 'sleep quality'/exp OR 'sleep stage'/exp OR 'sleep time'/exp OR 'sleep waking cycle'/exp OR 'sleep deprivation'/de OR 'sleep parameters'/exp OR 'sleep disorder'/de OR 'circadian rhythm sleep disorder'/exp OR 'fragmented sleep'/exp OR 'hypersomnia'/exp OR 'insomnia'/exp OR 'parasomnia'/exp OR 'sleep disordered breathing'/exp OR (sleep\* OR insomnia\* OR hypersomn\* OR hyposomn\* OR dyssomni\* OR parasomni\* OR (circadian\* NEAR/3 disrupt\*)):ab,ti) AND (pregnancy/exp OR 'pregnant woman'/de OR 'prepregnancy care'/de OR conception/de OR 'pregnancy outcome'/exp OR 'pregnancy complication'/mj OR 'pregnancy disorder'/mj OR 'spontaneous abortion'/de OR (pregnan\* OR prepregnancy OR preconception\* OR periconception\* OR pre-conception\* OR peri-conception\* OR (concepti\* NEAR/3 (before OR around OR period\*)) OR (spontan\* NEAR/3 abortion\*) OR miscarriage\*):ab,ti) NOT ([animals]/lim NOT [humans]/lim) NOT [conference abstract]/lim AND [english]/lim NOT ('case report'/de OR case-report:ti)

### **Medline ALL Ovid**

(Sleep/ OR Sleep Hygiene/ OR exp Sleep Stages/ OR Sleep Deprivation/ OR Sleep Wake Disorders/ OR Sleep Initiation and Maintenance Disorders/ OR Sleep Disorders, Circadian Rhythm/ OR Disorders of Excessive Somnolence/ OR exp Parasomnias/ OR Sleep Apnea Syndromes/ OR (sleep\* OR insomnia\* OR hypersomn\* OR hyposomn\* OR dyssomni\* OR parasomni\* OR (circadian\* ADJ3 disrupt\*)):ab,ti.) AND (exp Pregnancy/ OR Pregnant Women/ OR Preconception Care/ OR Fertilization/ OR exp Pregnancy Outcome/ OR \* Pregnancy Complications/ OR Abortion, Spontaneous/ OR (pregnan\* OR prepregnancy OR preconception\* OR periconception\* OR pre-conception\* OR peri-conception\* OR (concepti\* ADJ3 (before OR around OR period\*)) OR (spontan\* ADJ3 abortion\*) OR miscarriage\*):ab,ti.) NOT (exp animals/ NOT humans/) AND english.la. NOT (case reports/ OR case-report.ti.)

### **Web of Science**

TS=((((sleep\* OR insomnia\* OR hypersomn\* OR hyposomn\* OR dyssomni\* OR parasomni\* OR (circadian\* NEAR/2 disrupt\*))) AND ((pregnan\* OR prepregnancy OR preconception\* OR periconception\* OR pre-conception\* OR peri-conception\* OR (concepti\* NEAR/2 (before OR around OR period\*)) OR (spontan\* NEAR/2 abortion\*) OR miscarriage\*))) AND DT=(article) AND LA=(english) NOT TI=("case report"))

### **Cochrane CENTRAL**

((sleep\* OR insomnia\* OR hypersomn\* OR hyposomn\* OR dyssomni\* OR parasomni\* OR (circadian\* NEAR/3 disrupt\*)):ab,ti) AND ((pregnan\* OR prepregnancy OR preconception\* OR periconception\* OR pre NEXT conception\* OR peri NEXT conception\* OR (concepti\* NEAR/3 (before OR around OR period\*)) OR (spontan\* NEAR/3 abortion\*) OR miscarriage\*):ab,ti)

**Table S1.** Extensive overview of associations of included studies regarding maternal sleep problems in the periconceptional period (N=27).

| Study                                   | Outcomes                                                                                                                                                                                                                                                                                                                                                                                                                                                                                                                                                                                                                                                                                                                                                                                                                                                                                                                                                                                                                                                                                                                                          |
|-----------------------------------------|---------------------------------------------------------------------------------------------------------------------------------------------------------------------------------------------------------------------------------------------------------------------------------------------------------------------------------------------------------------------------------------------------------------------------------------------------------------------------------------------------------------------------------------------------------------------------------------------------------------------------------------------------------------------------------------------------------------------------------------------------------------------------------------------------------------------------------------------------------------------------------------------------------------------------------------------------------------------------------------------------------------------------------------------------------------------------------------------------------------------------------------------------|
| Bublitz <i>et al.</i> (2010)            | <p>Both cross-sectionally (<math>F=0.74</math>; <math>p=.39</math>) and longitudinally (<math>F=.43</math>; <math>p=.51</math>), no statistic significant association was found between self-reported measures of sleep disordered breathing at 12 weeks of gestation, as measured by the Berlin Questionnaire.</p> <p>Cross-sectionally, the authors did not find a statistical significant association between objective measures of sleep disordered breathing at 12 weeks of gestation, as measured by the apnea-hypopnea index (AHI). Longitudinally, associations were found in late pregnancy (32 weeks of gestation). This was found unadjusted (<math>\beta=0.20</math>; <math>SE=1.89</math>; <math>p=.026</math>), adjusted for various covariates (<math>\beta=0.22</math>; <math>SE=1.89</math>; <math>p=.012</math>), when the sleep item was additionally removed from the Patient Health Questionnaire-9 (<math>\beta=0.25</math>; <math>SE=1.60</math>; <math>p=0.004</math>), and when women who used antidepressants were removed from the analyses (<math>\beta=0.19</math>; <math>SE=1.99</math>; <math>p=0.043</math>).</p> |
| Chang <i>et al.</i> (2015)              | <p>PSQI subscale sleep latency was associated with depression, assessed with the Edinburgh Postnatal Depression Scale (effect size 1.27; <math>p&lt;.05</math>), and with fruit and vegetable intake, assessed with the Rapid Food Screener (effect size 2.17; <math>p&lt;.05</math>) in the first trimester.</p>                                                                                                                                                                                                                                                                                                                                                                                                                                                                                                                                                                                                                                                                                                                                                                                                                                 |
| Doyon <i>et al.</i> (2020)              | <p>More hours of self-reported sleep was associated with lower blood glucose at 1 hour post 50 g (<math>\beta=0.013</math> of log-transformed glucose for each hour of sleep; <math>SE=0.007</math>; <math>p=.06</math>). The strength of the association was reduced after adjusting for confounders (<math>\beta=0.009</math>; <math>SE=0.007</math>; <math>p=.17</math>).</p> <p>Models estimated 1 hour post 50 g glucose values at 5.60 mmol/L (95%CI 5.35-5.86) for women sleeping 5 hours per night, 5.43 (95%CI 5.34-5.52) for 8 hours per night and 5.26 (95%CI 5.06-5.46) for 11 hours of sleep per night.</p>                                                                                                                                                                                                                                                                                                                                                                                                                                                                                                                          |
| Facco <i>et al.</i> (2018) <sup>a</sup> | <p>Self-reported short sleep duration (&lt;7 hours) in the first trimester was associated with hypertensive disorders (OR 1.31; 95%CI 1.10-1.55; <math>p=.002</math>) and gestational diabetes (OR 1.45; 95%CI 1.10-1.92; <math>p=.009</math>). Results were not significant after adjustment for confounders: hypertension aOR 1.19 (95% CI 1.00-1.42; <math>p=.053</math>); gestational diabetes aOR 1.23 (95%CI 0.92-1.64; <math>p=.164</math>).</p> <p>Late sleep midpoint (after 5 AM) in the first trimester was not associated with hypertensive disorders (OR 1.22; 95%CI 1.00-1.49; <math>p=.055</math>), which remained after adjusting for confounders (aOR 1.15; 95%CI 0.92-1.43; <math>p=.216</math>).</p> <p>Late sleep midpoint (after 5 AM) in the first trimester was not associated with gestational diabetes (OR 1.31; 95%CI 0.94-1.82; <math>p=.111</math>). When confounded for only age and BMI, the association was statistically significant (aOR 1.67; 95%CI 1.17-2.38; <math>p=.004</math>). However, this disappeared after adjustment for further confounders (aOR 1.37; 95%CI 0.95-1.98; <math>p=.089</math>).</p>   |
| Facco <i>et al.</i> (2019) <sup>a</sup> | <p>Self-reported short sleep duration (&lt;7 hours) in the first trimester was not associated with preterm birth (crude: OR 1.17; 95%CI 0.94-1.47; <math>p=.16</math>; adjusted: aOR 1.15 (95%CI 0.92-1.44; <math>p=.23</math>) and spontaneous preterm birth (crude: OR 1.11; 95%CI 0.84-1.46; <math>p=.48</math>; adjusted: aOR 1.11; 95%CI 0.84-1.47; <math>p=.47</math>).</p>                                                                                                                                                                                                                                                                                                                                                                                                                                                                                                                                                                                                                                                                                                                                                                 |

|                                         |                                                                                                                                                                                                                                                                                                                                                                                                                                                                                                                                                                                                                                                                                                                                                                                                                                                                                                                                                                                                                                                                                                                                                                                                                                                                                                                                                                                                                                                                                                                                                                                                                                                        |
|-----------------------------------------|--------------------------------------------------------------------------------------------------------------------------------------------------------------------------------------------------------------------------------------------------------------------------------------------------------------------------------------------------------------------------------------------------------------------------------------------------------------------------------------------------------------------------------------------------------------------------------------------------------------------------------------------------------------------------------------------------------------------------------------------------------------------------------------------------------------------------------------------------------------------------------------------------------------------------------------------------------------------------------------------------------------------------------------------------------------------------------------------------------------------------------------------------------------------------------------------------------------------------------------------------------------------------------------------------------------------------------------------------------------------------------------------------------------------------------------------------------------------------------------------------------------------------------------------------------------------------------------------------------------------------------------------------------|
|                                         | <p>Late sleep midpoint (after 5 AM) in the first trimester was associated with a higher rate of preterm birth (9.5% vs 6.9%; <math>p=.005</math>) and of spontaneous preterm birth (6.2% vs 4.4%; <math>p=.019</math>), compared to women with an early sleep midpoint (before 5 AM).</p> <p>Crude OR for preterm birth 1.42 (95%CI 1.11-1.82; <math>p=.005</math>) and spontaneous preterm birth 1.43 (95%CI 1.06-1.93; <math>p=.019</math>).</p> <p>After adjustment for age and BMI, the association remained with preterm birth (aOR 1.39; 95%CI 1.08-1.80, <math>p=.01</math>) and spontaneous preterm birth (aOR 1.45; 95%CI 1.06-1.99, <math>p=.02</math>). After further adjustment, the association remained for preterm birth (aOR 1.34; 95%CI 1.03-1.74; <math>p=.03</math>), but not for spontaneous preterm birth (aOR 1.34; 95%CI 0.97-1.85; <math>p=.07</math>).</p>                                                                                                                                                                                                                                                                                                                                                                                                                                                                                                                                                                                                                                                                                                                                                                    |
| Franco-Sena <i>et al.</i> (2018)        | <p>Among nulliparous women, 24-h sleep duration in the first trimester was inversely associated with infant's body weight z-score (crude; <math>\beta=-0.35</math>; 95%CI 0.57-0.14; <math>p=.07</math>; for model 1: <math>\beta=0.44</math>; 95%CI 0.68-0.21; <math>p&lt;.001</math>; for model 2: <math>\beta=-0.42</math>; 95%CI 0.65-0.18; <math>p&lt;.001</math>).</p> <p>First trimester nightly sleep duration was associated with infant's body weight z-score (<math>\beta=-0.28</math>; 95%CI 0.53-0.03; <math>p=.029</math>), but not after adjusting for confounders (<math>\beta=-0.27</math>; 95%CI 0.58-0.05; <math>p=.092</math>).</p> <p>First trimester napping sleep duration was not associated with infant's body weight (crude <math>\beta=-0.08</math>; 95%CI 0.60-0.44; <math>p=.757</math>; adjusted <math>\beta=-0.20</math>; 95%CI 0.77-0.37; <math>p=.485</math>).</p> <p>Among multiparous women, first trimester nightly sleep duration was not associated with infant body weight (crude <math>\beta=-0.07</math>; 95%CI 0.28-0.13; <math>p=.478</math>; adjusted <math>\beta=-0.01</math>; 95%CI 0.24-0.22; <math>p=.954</math>).</p> <p>First trimester napping sleep duration was not associated with infant body weight (crude <math>\beta=-0.13</math>; 95%CI 0.62-0.35; <math>p=.580</math>; adjusted <math>\beta=0.11</math>; 95%CI 0.49-0.71; <math>p=.719</math>).</p> <p>First trimester 24-h sleep duration was not associated with infant body weight (crude <math>\beta=-0.09</math>; 95%CI 0.25-0.07; <math>p=.277</math>; adjusted <math>\beta=-0.36</math>; 95%CI 1.39-0.66; <math>p=.483</math>).</p> |
| Gelaye <i>et al.</i> (2015)             | <p>A PSQI score of <math>&gt;5</math> in the first trimester was associated with suicidal ideation (OR 2.72; 95%CI 1.78–4.16), compared to a PSQI score of <math>\leq 5</math>. After adjustment for confounders, the association remained (aOR 2.19; 95% CI 1.40–3.42). After further adjustment for maternal depression, PSQI <math>&gt;5</math> was still associated with suicidal ideation (aOR 1.67; 95% CI 1.02–2.71).</p> <p>When assessed as continuous variable, first trimester total PSQI score was also associated with increased odds for suicidal ideation (crude: OR 1.26; 95%CI 1.17-1.36; model 1: aOR 1.22; 95%CI 1.13-1.32; model 2: aOR 1.18; 95%CI 1.08-1.28).</p>                                                                                                                                                                                                                                                                                                                                                                                                                                                                                                                                                                                                                                                                                                                                                                                                                                                                                                                                                                |
| Georgiou <i>et al.</i> (2019)           | <p>Women with preeclampsia appear to have higher rates of insomnia (OR 5.03; 95%CI 1.41-17.89; <math>p&lt;.05</math>), less sleep quality (OR 4.45; 95%CI 1.53-12.99; <math>p&lt;.05</math>), and more sleepiness (OR 3.27; 95%CI 1.15-9.31; <math>p&lt;.05</math>) before pregnancy, compared to women without pre-eclampsia.</p>                                                                                                                                                                                                                                                                                                                                                                                                                                                                                                                                                                                                                                                                                                                                                                                                                                                                                                                                                                                                                                                                                                                                                                                                                                                                                                                     |
| Haney <i>et al.</i> (2014) <sup>b</sup> | <p>Diary-assessed sleep latency at 10-12 weeks was correlated with systolic blood pressure at 14-16 weeks after adjusting for covariates (<math>r(132)=0.18</math>, <math>p=.03</math>), but not after correcting for multiple comparisons.</p>                                                                                                                                                                                                                                                                                                                                                                                                                                                                                                                                                                                                                                                                                                                                                                                                                                                                                                                                                                                                                                                                                                                                                                                                                                                                                                                                                                                                        |

|                                |                                                                                                                                                                                                                                                                                                                                                                                                                                                                                                                                                                                                                                                                                                                                                                                                                                                                                                                                                                                                                                                                                                                                                                         |
|--------------------------------|-------------------------------------------------------------------------------------------------------------------------------------------------------------------------------------------------------------------------------------------------------------------------------------------------------------------------------------------------------------------------------------------------------------------------------------------------------------------------------------------------------------------------------------------------------------------------------------------------------------------------------------------------------------------------------------------------------------------------------------------------------------------------------------------------------------------------------------------------------------------------------------------------------------------------------------------------------------------------------------------------------------------------------------------------------------------------------------------------------------------------------------------------------------------------|
|                                | Neither diary- nor actigraphy-assessed wake after sleep onset and total sleep time were associated with any of the cardiometabolic factors.                                                                                                                                                                                                                                                                                                                                                                                                                                                                                                                                                                                                                                                                                                                                                                                                                                                                                                                                                                                                                             |
| Hill <i>et al.</i> (2020)      | <p>In models adjusted for covariates, first trimester PSQI score was not associated with gestational weight gain adequacy (for inadequate weight gain: OR 1.00 (95%CI 0.88-1.13; p=.99); for excessive weight gain: OR 0.95 (95%CI 0.86-1.06; p=.35).</p> <p>There was also no association with first trimester sleep duration (for inadequate weight gain: OR 1.03 (95%CI 0.73-1.46; p=.85); for excessive weight gain: OR 1.09 (95%CI 0.84-1.42; p=.50).</p> <p>First trimester pregnancy sleep duration and quality were not associated with gestational fat gain (respectively, <math>\beta=0.01</math>; SE=0.17; p=.97; <math>\beta=0.03</math>; SE=0.07; p=.66).</p>                                                                                                                                                                                                                                                                                                                                                                                                                                                                                              |
| Liu <i>et al.</i> (2019)       | <p>First trimester PSQI was correlated with female infant body weight z-score (<math>r=-0.093</math>; <math>p&lt;.05</math>), but not with male infant body weight z-score (<math>r=0.022</math>; <math>p&gt;.05</math>).</p> <p>After adjusting for confounders, first trimester PSQI scores were associated with bodyweight z-scores among female newborns (<math>\beta = -0.029</math>; 95%CI 0.057-0.001; <math>p=.045</math>). This association remained statistically significant after further adjustment (<math>\beta = -0.032</math>, 95% CI 0.063-0.001, <math>p=.043</math>).</p> <p>These results were not found for male newborns (model 1: <math>\beta=0.027</math>; 95%CI 0.002-0.057; <math>p=.071</math>; model 2: <math>\beta=0.026</math>; 95%CI 0.006-0.058; <math>p=.113</math>).</p> <p>First trimester PSQI score was not a risk factor for small for gestational age (model 1: aOR 1.052; 95%CI 0.892-1.241; <math>p=.546</math>; model 2: aOR 1.040; 95%CI 0.865-1.250; <math>p=.678</math>) or low birth weight (model 1: aOR 1.010; 95%CI 0.733-1.391; <math>p=.953</math>; model 2: aOR 1.170; 95%CI 0.821-1.669; <math>p=.386</math>).</p> |
| Lyu <i>et al.</i> (2020)       | <p>Less maternal sleep duration in the first trimester was observed when their children had either shorter sleep duration (<math>\beta=0.113</math>; SE=0.012; <math>p&lt;.001</math>) or sleep problems (<math>\beta=-0.308</math>; SE=0.072; <math>p&lt;.001</math>).</p> <p>Maternal short sleep duration (<math>\leq 8</math> hours) in the first trimester could predict both short infant sleep duration (<math>&lt;10</math> hours; crude: OR 1.24; 95%CI 1.12-1.38; <math>p&lt;.01</math>; adjusted: aOR 1.25; 95%CI 1.12-1.39; <math>p&lt;.01</math>). It could also predict infant sleep disturbance (OR 1.28; 95%CI 1.04-1.59; <math>p&lt;.01</math>), but not after adjustment for confounders (aOR 1.13; 95%CI 0.90-1.42; <math>p&gt;.05</math>).</p>                                                                                                                                                                                                                                                                                                                                                                                                      |
| Marinelli <i>et al.</i> (2021) | <p>Each hour of sleep increased neonate birth weights by 44.7 grams in women sleeping <math>&lt;7</math> hours per day before pregnancy (<math>\beta 44.72</math> (95%CI 0.28-89.17); <math>p=0.049</math>). Neonate birth weight decreased by 39.2 grams in women sleeping <math>\geq 9</math> hours of sleep per day before pregnancy (<math>\beta=-39.22</math> (95%CI -61.46-16.97); <math>p=.001</math>).</p> <p>Associations between maternal sleep duration before pregnancy and birth weight were similar after adjusting for additional confounders.</p>                                                                                                                                                                                                                                                                                                                                                                                                                                                                                                                                                                                                       |

---

After adjusting for alcohol:

- $\leq 7$  hours:  $\beta=45.27$  (95%CI 0.86-89.68);  $p=0.046$
- $>7$  hours and  $\leq 9$  hours:  $\beta=15.54$  (95%CI -9.55-40.64);  $p=.225$
- $>9$  hours:  $\beta=-38.82$  (95%CI -61.05-16.58);  $p=.001$

After adjusting for smoking:

- $\leq 7$  hours:  $\beta=39.87$  (95%CI -4.26-84.01);  $p=.077$
- $>7$  hours and  $\leq 9$  hours:  $\beta=14.08$  (95%CI -10.85-39.02);  $p=0.268$
- $>9$  hours:  $\beta=-33.17$  (95%CI -55.35-10.99);  $p=.003$

After adjusting for maternal education:

- $\leq 7$  hours:  $\beta=39.06$  (-5.20-83.32);  $p=.084$
- $>7$  hours and  $\leq 9$  hours:  $\beta=14.74$  (-10.20-39.68);  $p=0.247$
- $>9$  hours:  $\beta=-31.79$  (95%CI -54.04-9.54);  $p=.005$

After adjusting for parity:

- $\leq 7$  hours:  $\beta=35.73$  (95%CI -7.85-79.30);  $p=.108$
- $>7$  hours and  $\leq 9$  hours:  $\beta=18.33$  (95%CI -6.27-42.94);  $p=.144$
- $>9$  hours:  $\beta=-33.29$  (95%CI -55.15-11.44);  $p=.003$

After adjusting for marital status:

- $\leq 7$  hours:  $\beta=39.95$  (95%CI -4.18-84.09);  $p=0.076$
- $>7$  hours and  $\leq 9$  hours:  $\beta=14.12$  (95%CI -10.81-39.05);  $p=.267$
- $>9$  hours:  $\beta=-33.33$  (95%CI -55.52-11.14);  $p=.003$

After adjusting for working during pregnancy:

- $\leq 7$  hours:  $\beta=41.00$  (95%CI -3.18-85.19);  $p=.069$
- $>7$  hours and  $\leq 9$  hours:  $\beta=12.38$  (95%CI -12.73-37.49);  $p=.334$
- $>9$  hours:  $\beta=-35.06$  (95%CI -57.45-12.68);  $p=.002$

After adjusting for mother's social class:

- $\leq 7$  hours:  $\beta=38.88$  (95%CI -5.25-83.02);  $p=.084$
- $>7$  hours and  $\leq 9$  hours:  $\beta=14.13$  (95%CI -10.78-39.03);  $p=.266$
- $>9$  hours:  $\beta=-32.61$  (95%CI -54.82-10.41);  $p=.004$

After adjusting for total physical activity:

- $\leq 7$  hours:  $\beta=39.89$  (95%CI -4.24-84.03);  $p=.076$
  - $>7$  hours and  $\leq 9$  hours:  $\beta=14.09$  (95%CI -10.84-39.03);  $p=.268$
  - $>9$  hours:  $\beta=-33.21$  (95%CI -55.39-11.02);  $p=.003$
-

---

After adjusting for anxiety clinical history reported at first trimester:

- $\leq 7$  hours:  $\beta=39.97$  (95%CI -4.23-84.17);  $p=.076$
- $>7$  hours and  $\leq 9$  hours:  $\beta=14.02$  (95%CI -10.94-38.97);  $p=.271$
- $>9$  hours:  $\beta=-33.13$  (95%CI -55.32-10.93);  $p=.003$

After adjusting for depression clinical history reported at first trimester:

- $\leq 7$  hours:  $\beta=39.95$  (95%CI -4.25-84.15);  $p=.076$
- $>7$  hours and  $\leq 9$  hours:  $\beta=14.10$  (95%CI -10.85-39.05);  $p=.268$
- $>9$  hours:  $\beta=-33.30$  (-55.51-11.09);  $p=.003$

---

Matsuo *et al.* (2021) Short sleep duration was associated with a higher risk of postpartum depression (7-8 hours reference group):

- $<6$  hours: crude OR 2.06 (95%CI 1.64-2.59); adjusted OR 2.08 (95%CI 1.60-2.70)
- 6-7 hours: crude OR 1.42 (95%CI 1.21-1.66); adjusted OR 1.41 (95%CI 1.18-1.68)
- 8-9 hours: crude OR 1.16 (95%CI 0.97-1.38); adjusted OR 1.15 (95%CI 0.94-1.42)
- $\geq 9$  hours: crude OR 1.20 (95%CI 0.88-1.65); adjusted OR 1.19 (95%CI 0.81-1.76)
- 1 hour increase: crude OR 0.88 (95%CI 0.83-0.94); adjusted OR 0.86 (95%CI 0.80-0.92)

Among primipara women, the adjusted OR for high EPDS scores was higher only in women sleeping  $<6$  hours. Multipara women sleeping  $<6$  hours and 6-7 hours showed an increased risk of high EPDS scores.

Primipara women:

- $<6$  hours: crude OR 1.50 (95%CI 1.09-2.05); adjusted OR 1.46 (95%CI 1.02-2.11)
- 6-7 hours: crude OR 1.23 (95%CI 1.02-1.49); adjusted OR 1.24 (95%CI 0.99-1.54)
- 8-9 hours: crude OR 1.28 (95%CI 1.03-1.59); adjusted OR 1.22 (95%CI 0.94-1.58)
- $\geq 9$  hours: crude OR 1.40 (95%CI 0.94-2.08); adjusted OR 1.49 (95%CI 0.92-2.40)
- 1 hour increase: crude OR 0.98 (95%CI 0.91-1.06); adjusted OR 0.96 (95%CI 0.88-1.06)

Multipara women:

- $<6$  hours: crude OR 3.42 (95%CI 2.42-4.82); adjusted OR 3.26 (95%CI 2.21-4.81)
- 6-7 hours: crude OR 1.76 (95%CI 1.34-2.33); adjusted OR 1.89 (95%CI 1.38-2.58)
- 8-9 hours: crude OR 1.25 (95%CI 0.93-1.67); adjusted OR 1.11 (95%CI 0.79-1.58)
- $\geq 9$  hours: crude OR 1.16 (95%CI 0.68-1.99); adjusted OR 0.90 (95%CI 0.46-1.78)
- 1 hour increase: crude OR 0.78 (95%CI 0.71-0.86); adjusted OR 0.74 (95%CI 0.66-0.83)

---

Nakahara *et al.* (2020)<sup>c</sup> Self-reported sleep duration before pregnancy was not associated with preterm birth (7-8 hours reference group):

- $<6$  hours: model 1 aRR 1.08 (95%CI 0.95-1.22); model 2 aRR 1.04 (95%CI 0.92-1.17)
  - 6-7 hours: model 1 aRR 1.08 (95%CI 0.99-1.18); model 2 aRR 1.06 (95%CI 0.97-1.15)
  - 8-9 hours: model 1 aRR 0.99 (95%CI 0.91-1.07); model 2 aRR 1.00 (95%CI 0.92-1.09)
  - 9-10 hours: model 1 aRR 0.93 (95%CI 0.83-1.05); model 2 aRR 0.93 (95%CI 0.83-1.04)
-

- 
- >10 hours: model 1 aRR 1.04 (95%CI 0.89-1.22); model 2 aRR 1.00 (95%CI 0.85-1.16)
- Self-reported bedtime before pregnancy was not associated with preterm birth (21:00-24:00 reference group):
- 24:00-03:00: model 1 aRR 1.02 (95%CI 0.95-1.09); model 2 aRR 1.00 (95%CI 0.94-1.08)
  - Other: model 1 aRR 0.99 (95%CI 0.81-1.19); model 2 aRR 0.91 (95%CI 0.75-1.11)

- Self-reported sleep duration before pregnancy was not associated with infant awakenings (7-8 hours reference group):
- <6 hours: model 1 aRR 1.02 (95%CI 0.91-1.14); model 2 aRR 1.07 (95%CI 0.96-1.20)
  - 6-7 hours: model 1 aRR 0.91 (95%CI 0.84-0.98); model 2 aRR 0.95 (95%CI 0.87-1.02)
  - 8-9 hours: model 1 aRR 1.04 (95%CI 0.97-1.11); model 2 aRR 1.00 (95%CI 0.93-1.07)
  - 9-10 hours: model 1 aRR 1.05 (95%CI 0.96-1.16); model 2 aRR 0.99 (95%CI 0.90-1.09)
  - >10 hours: model 1 aRR 1.03 (95%CI 0.90-1.17); model 2 aRR 0.98 (95%CI 0.86-1.13)
- Self-reported bed time before pregnancy was not associated with infant awakenings (21:00-24:00 reference group):
- 24:00-03:00: model 1 aRR 0.96 (95%CI 0.90-1.02); model 2 aRR 1.05 (95%CI 0.98-1.12)
  - Other: model 1 aRR 1.13 (95%CI 0.96-1.32); model 2 aRR 1.17 (95%CI 1.00-1.37)

- Self-reported sleep duration before pregnancy was associated with infant's tendency to sleep longer during the day than the night (7-8 hours reference group):
- <6 hours: model 1 aRR 1.24 (95%CI 1.17-1.31); model 2 aRR 1.18 (95%CI 1.12-1.25)
  - 6-7 hours: model 1 aRR 1.14 (95%CI 1.09-1.18); model 2 aRR 1.10 (95%CI 1.06-1.15)
  - 8-9 hours: model 1 aRR 0.93 (95%CI 0.90-0.97); model 2 aRR 0.98 (95%CI 0.95-1.02)
  - 9-10 hours: model 1 aRR 0.87 (95%CI 0.82-0.92); model 2 aRR 0.94 (95%CI 0.89-1.00)
  - >10 hours: model 1 aRR 0.92 (95%CI 0.85-0.99); model 2 aRR 0.94 (95%CI 0.88-1.02)
- Self-reported bed time before pregnancy was associated with infant's tendency to sleep longer during the day than the night (21:00-24:00 reference group):
- 24:00-03:00: model 1 aRR 1.28 (95%CI 1.24-1.32); model 2 aRR 1.17 (95%CI 1.13-1.20)
  - Other: model 1 aRR 1.20 (95%CI 1.11-1.30); model 2 aRR 1.13 (95%CI 1.04-1.22)

- Self-reported sleep duration before pregnancy was associated with bad mood of the infant (7-8 hours reference group):
- <6 hours: model 1 aRR 1.33 (95%CI 1.21-1.47); model 2 aRR 1.12 (95%CI 1.01-1.23)
  - 6-7 hours: model 1 aRR 1.26 (95%CI 1.17-1.35); model 2 aRR 1.09 (95%CI 1.01-1.16)
  - 8-9 hours: model 1 aRR 0.76 (95%CI 0.70-0.82); model 2 aRR 0.97 (95%CI 0.90-1.05)
  - 9-10 hours: model 1 aRR 0.68 (95%CI 0.61-0.76); model 2 aRR 1.05 (95%CI 0.94-1.17)
  - >10 hours: model 1 aRR 1.00 (95%CI 0.87-1.14); model 2 aRR 1.17 (95%CI 1.02-1.33)
- Self-reported bed time before pregnancy was associated with bad mood of the infant (21:00-24:00 reference group):
- 24:00-03:00: model 1 aRR 1.68 (95%CI 1.59-1.77); model 2 aRR 1.12 (95%CI 1.06-1.19)
  - Other: model 1 aRR 1.35 (95%CI 1.15-1.57); model 2 aRR 1.10 (95%CI 0.94-1.29)

- Self-reported sleep duration before pregnancy was associated with frequent infant crying (7-8 hours reference group):
- <6 hours: model 1 aRR 1.28 (95%CI 1.21-1.35); model 2 aRR 1.17 (95%CI 1.11-1.24)
  - 6-7 hours: model 1 aRR 1.18 (95%CI 1.14-1.23); model 2 aRR 1.09 (95%CI 1.05-1.13)
-

- 
- 8-9 hours: model 1 aRR 0.85 (95%CI 0.82-0.89); model 2 aRR 0.98 (95%CI 0.94-1.02)
  - 9-10 hours: model 1 aRR 0.74 (95%CI 0.69-0.78); model 2 aRR 0.91 (95%CI 0.86-0.97)
  - >10 hours: model 1 aRR 0.94 (95%CI 0.87-1.01); model 2 aRR 1.01 (95%CI 0.94-1.09)
- Self-reported bed time before pregnancy was associated with frequent infant crying (21:00-24:00 reference group):
- 24:00-03:00: model 1 aRR 1.38 (95%CI 1.33-1.42); model 2 aRR 1.09 (95%CI 1.06-1.13)
  - Other: model 1 aRR 1.09 (95%CI 1.00-1.20); model 2 aRR 0.96 (95%CI 0.88-1.06)
- Self-reported sleep duration before pregnancy was associated with intense infant crying (7-8 hours reference group):
- <6 hours: model 1 aRR 1.30 (95%CI 1.23-1.36); model 2 aRR 1.15 (95%CI 1.09-1.20)
  - 6-7 hours: model 1 aRR 1.21 (95%CI 1.17-1.25); model 2 aRR 1.08 (95%CI 1.04-1.12)
  - 8-9 hours: model 1 aRR 0.80 (95%CI 0.77-0.84); model 2 aRR 0.97 (95%CI 0.93-1.01)
  - 9-10 hours: model 1 aRR 0.69 (95%CI 0.65-0.74); model 2 aRR 0.95 (95%CI 0.89-1.00)
  - >10 hours: model 1 aRR 0.88 (95%CI 0.81-0.94); model 2 aRR 0.98 (95%CI 0.91-1.06)
- Self-reported bed time before pregnancy was associated with intense infant crying (21:00-24:00 reference group):
- 24:00-03:00: model 1 aRR 1.46 (95%CI 1.42-1.51); model 2 aRR 1.07 (95%CI 1.04-1.10)
  - Other: model 1 aRR 1.14 (95%CI 1.04-1.24); model 2 aRR 0.97 (95%CI 0.89-1.05)
- 

Nakahara *et al.*  
(2021)<sup>c</sup>

- Self-reported sleep duration before pregnancy was not associated with >3 nighttime waking instances (7-8 hours reference group):
- <6 hours: model 1 aRR 1.04 (95%CI 0.85-1.26); model 2 aRR 1.08 (95%CI 0.89-1.32)
  - 6-7 hours: model 1 aRR 0.95 (95%CI 0.83-1.09); model 2 aRR 0.96 (95%CI 0.84-1.10)
  - 8-9 hours: model 1 aRR 1.10 (95%CI 0.98-1.24); model 2 aRR 1.09 (95%CI 0.96-1.23)
  - 9-10 hours: model 1 aRR 1.23 (95%CI 1.05-1.43); model 2 aRR 1.20 (95%CI 1.02-1.40)
  - >10 hours: model 1 aRR 1.06 (95%CI 0.84-1.35); model 2 aRR 1.07 (95%CI 0.84-1.36)
- Self-reported bed time before pregnancy was associated with >3 nighttime waking instances (21:00-24:00 reference group):
- 24:00-03:00: model 1 aRR 0.85 (95%CI 0.76-0.94); model 2 aRR 0.89 (95%CI 0.80-0.99)
  - Other: model 1 aRR 0.83 (95%CI 0.61-1.14); model 2 aRR 0.90 (95%CI 0.65-1.23)
- Self-reported sleep duration before pregnancy was associated with >1 waking instance lasting >1 hour (7-8 hours reference group):
- <6 hours: model 1 aRR 1.54 (95%CI 1.38-1.71); model 2 aRR 1.49 (95%CI 1.34-1.66)
  - 6-7 hours: model 1 aRR 1.18 (95%CI 1.09-1.28); model 2 aRR 1.16 (95%CI 1.07-1.26)
  - 8-9 hours: model 1 aRR 0.94 (95%CI 0.86-1.02); model 2 aRR 0.96 (95%CI 0.89-1.04)
  - 9-10 hours: model 1 aRR 0.96 (95%CI 0.86-1.07); model 2 aRR 1.00 (95%CI 0.90-1.12)
  - >10 hours: model 1 aRR 1.24 (95%CI 1.08-1.42); model 2 aRR 1.25 (95%CI 1.09-1.44)
- Self-reported bed time before pregnancy was associated with >1 waking instance lasting >1 hour (21:00-24:00 reference group):
- 24:00-03:00: model 1 aRR 1.44 (95%CI 1.35-1.53); model 2 aRR 1.38 (95%CI 1.30-1.47)
  - Other: model 1 aRR 1.99 (95%CI 1.73-2.28); model 2 aRR 1.92 (95%CI 1.67-2.21)
-



---

Self-reported sleep duration before pregnancy was associated with <8 hour of sleep during the night (20:00-07:59) (7-8 hours reference group):

- <6 hours: model 1 aRR 1.65 (95%CI 1.48-1.84); model 2 aRR 1.60 (95%CI 1.44-1.79)
- 6-7 hours: model 1 aRR 1.21 (95%CI 1.11-1.31); model 2 aRR 1.19 (95%CI 1.09-1.29)
- 8-9 hours: model 1 aRR 0.89 (95%CI 0.82-0.98); model 2 aRR 0.92 (95%CI 0.84-1.00)
- 9-10 hours: model 1 aRR 0.86 (95%CI 0.77-0.97); model 2 aRR 0.90 (95%CI 0.80-1.02)
- >10 hours: model 1 aRR 1.25 (95%CI 1.08-1.44); model 2 aRR 1.26 (95%CI 1.09-1.46)

Self-reported bed time before pregnancy was associated with <8 hour of sleep during the night (20:00-07:59) (21:00-24:00 reference group):

- 24:00-03:00: model 1 aRR 1.37 (95%CI 1.28-1.46); model 2 aRR 1.31 (95%CI 1.22-1.40)
- Other: model 1 aRR 2.11 (95%CI 1.84-2.43); model 2 aRR 2.04 (95%CI 1.77-2.35)

Self-reported sleep duration before pregnancy was associated with falling asleep at 22:00 or later (7-8 hours reference group):

- <6 hours: model 1 aRR 1.39 (95%CI 1.32-1.46); model 2 aRR 1.33 (95%CI 1.26-1.40)
- 6-7 hours: model 1 aRR 1.17 (95%CI 1.13-1.22); model 2 aRR 1.15 (95%CI 1.10-1.19)
- 8-9 hours: model 1 aRR 0.94 (95%CI 0.90-0.97); model 2 aRR 0.96 (95%CI 0.92-1.00)
- 9-10 hours: model 1 aRR 0.80 (95%CI 0.76-0.85); model 2 aRR 0.84 (95%CI 0.79-0.89)
- >10 hours: model 1 aRR 1.02 (95%CI 0.95-1.10); model 2 aRR 1.02 (95%CI 0.95-1.10)

Self-reported bed time before pregnancy was associated with falling asleep at 22:00 or later (21:00-24:00 reference group):

- 24:00-03:00: model 1 aRR 1.60 (95%CI 1.55-1.65); model 2 aRR 1.53 (95%CI 1.48-1.58)
- Other: model 1 aRR 1.40 (95%CI 1.29-1.52); model 2 aRR 1.34 (95%CI 1.23-1.45)

Self-reported sleep duration before pregnancy was not associated with frequency of crying at night ( $\geq 5$  days/week) (7-8 hours reference group):

- <6 hours: model 1 aRR 1.14 (95%CI 1.03-1.27); model 2 aRR 1.16 (95%CI 1.05-1.29)
- 6-7 hours: model 1 aRR 1.05 (95%CI 0.98-1.13); model 2 aRR 1.05 (95%CI 0.98-1.13)
- 8-9 hours: model 1 aRR 1.05 (95%CI 0.98-1.12); model 2 aRR 1.05 (95%CI 0.98-1.12)
- 9-10 hours: model 1 aRR 1.04 (95%CI 0.95-1.15); model 2 aRR 1.05 (95%CI 0.96-1.15)
- >10 hours: model 1 aRR 0.91 (95%CI 0.79-1.04); model 2 aRR 0.93 (95%CI 0.80-1.07)

Self-reported bed time before pregnancy was not associated with frequency of crying at night ( $\geq 5$  days/week) (21:00-24:00 reference group):

- 24:00-03:00: model 1 aRR 1.03 (95%CI 0.98-1.09); model 2 aRR 1.05 (95%CI 0.99-1.11)
- Other: model 1 aRR 1.06 (95%CI 0.90-1.24); model 2 aRR 1.11 (95%CI 0.95-1.31)

Self-reported sleep duration before pregnancy was not associated with communication (7-8 hours reference group):

- <6 hours: model 1 aRR 1.19 (95%CI 0.45-3.15); model 2 aRR 1.15 (95%CI 0.43-3.03)
  - 6-7 hours: model 1 aRR 1.40 (95%CI 0.75-2.61); model 2 aRR 1.32 (95%CI 0.71-2.47)
-

- 
- 8-9 hours: model 1 aRR 0.82 (95%CI 0.41-1.63); model 2 aRR 0.90 (95%CI 0.45-1.80)
  - 9-10 hours: model 1 aRR 0.95 (95%CI 0.39-2.35); model 2 aRR 1.12 (95%CI 0.45-2.82)
  - >10 hours: model 1 aRR 1.29 (95%CI 0.38-4.31); model 2 aRR 1.42 (95%CI 0.42-4.78)
- Self-reported bed time before pregnancy was not associated with communication (21:00-24:00 reference group):
- 24:00-03:00: model 1 aRR 1.01 (95%CI 0.59-1.73); model 2 aRR 0.86 (95%CI 0.49-1.50)
  - Other: model 1 aRR 1.33 (95%CI 0.32-5.51); model 2 aRR 1.39 (95%CI 0.33-5.79)

- Self-reported sleep duration before pregnancy was not associated with gross motor skills (7-8 hours reference group):
- <6 hours: model 1 aRR 1.08 (95%CI 0.95-1.23); model 2 aRR 1.07 (95%CI 0.94-1.22)
  - 6-7 hours: model 1 aRR 1.12 (95%CI 1.03-1.22); model 2 aRR 1.11 (95%CI 1.02-1.20)
  - 8-9 hours: model 1 aRR 0.99 (95%CI 0.91-1.07); model 2 aRR 1.02 (95%CI 0.93-1.10)
  - 9-10 hours: model 1 aRR 0.89 (95%CI 0.79-1.01); model 2 aRR 0.94 (95%CI 0.84-1.06)
  - >10 hours: model 1 aRR 0.82 (95%CI 0.69-0.99); model 2 aRR 0.86 (95%CI 0.72-1.03)

- Self-reported bed time before pregnancy was not associated with gross motor skills (21:00-24:00 reference group):
- 24:00-03:00: model 1 aRR 1.01 (95%CI 0.95-1.09); model 2 aRR 0.97 (95%CI 0.90-1.05)
  - Other: model 1 aRR 1.01 (95%CI 0.83-1.24); model 2 aRR 1.06 (95%CI 0.86-1.30)

- Self-reported sleep duration before pregnancy was not associated with fine motor skills (7-8 hours reference group):
- <6 hours: model 1 aRR 1.01 (95%CI 0.88-1.15); model 2 aRR 1.02 (95%CI 0.90-1.17)
  - 6-7 hours: model 1 aRR 1.04 (95%CI 0.95-1.13); model 2 aRR 1.05 (95%CI 0.97-1.15)
  - 8-9 hours: model 1 aRR 1.01 (95%CI 0.93-1.09); model 2 aRR 0.99 (95%CI 0.91-1.08)
  - 9-10 hours: model 1 aRR 1.00 (95%CI 0.90-1.12); model 2 aRR 0.98 (95%CI 0.87-1.09)
  - >10 hours: model 1 aRR 0.95 (95%CI 0.80-1.12); model 2 aRR 0.93 (95%CI 0.79-1.10)

- Self-reported bed time before pregnancy was not associated with fine motor skills (21:00-24:00 reference group):
- 24:00-03:00: model 1 aRR 0.96 (95%CI 0.90-1.03); model 2 aRR 1.00 (95%CI 0.93-1.07)
  - Other: model 1 aRR 0.92 (95%CI 0.74-1.13); model 2 aRR 0.94 (95%CI 0.76-1.16)

- Self-reported sleep duration before pregnancy was not associated with problems solving (7-8 hours reference group):
- <6 hours: model 1 aRR 1.09 (95%CI 0.95-1.25); model 2 aRR 1.06 (95%CI 0.93-1.21)
  - 6-7 hours: model 1 aRR 1.08 (95%CI 0.98-1.18); model 2 aRR 1.04 (95%CI 0.95-1.14)
  - 8-9 hours: model 1 aRR 1.00 (95%CI 0.92-1.09); model 2 aRR 1.05 (95%CI 0.96-1.15)
  - 9-10 hours: model 1 aRR 1.03 (95%CI 0.91-1.16); model 2 aRR 1.12 (95%CI 1.00-1.26)
  - >10 hours: model 1 aRR 1.04 (95%CI 0.88-1.24); model 2 aRR 1.10 (95%CI 0.93-1.31)

- Self-reported bed time before pregnancy was not associated with problems solving (21:00-24:00 reference group):
- 24:00-03:00: model 1 aRR 1.08 (95%CI 1.00-1.16); model 2 aRR 1.00 (95%CI 0.93-1.08)
  - Other: model 1 aRR 0.89 (95%CI 0.71-1.12); model 2 aRR 0.90 (95%CI 0.72-1.13)

- Self-reported sleep duration before pregnancy was not associated with personal-social characteristics (7-8 hours reference group):
- <6 hours: model 1 aRR 1.11 (95%CI 0.82-1.51); model 2 aRR 1.20 (95%CI 0.88-1.62)
-

|                                        |                                                                                                                                                                                                                                                                                                                                                                                                                                                                                                                                                                                                                                                                                                                                                                                                                                                                                                                                                                                                                                                                                                                                                                                                                                                                                                                                                                                                                                                                                                                                                                                                                                                                                                                                                                                                                                                                  |
|----------------------------------------|------------------------------------------------------------------------------------------------------------------------------------------------------------------------------------------------------------------------------------------------------------------------------------------------------------------------------------------------------------------------------------------------------------------------------------------------------------------------------------------------------------------------------------------------------------------------------------------------------------------------------------------------------------------------------------------------------------------------------------------------------------------------------------------------------------------------------------------------------------------------------------------------------------------------------------------------------------------------------------------------------------------------------------------------------------------------------------------------------------------------------------------------------------------------------------------------------------------------------------------------------------------------------------------------------------------------------------------------------------------------------------------------------------------------------------------------------------------------------------------------------------------------------------------------------------------------------------------------------------------------------------------------------------------------------------------------------------------------------------------------------------------------------------------------------------------------------------------------------------------|
|                                        | <ul style="list-style-type: none"> <li>6-7 hours: model 1 aRR 1.05 (95%CI 0.85-1.29); model 2 aRR 1.12 (95%CI 0.91-1.37)</li> <li>8-9 hours: model 1 aRR 1.33 (95%CI 1.11-1.60); model 2 aRR 1.23 (95%CI 1.02-1.48)</li> <li>9-10 hours: model 1 aRR 1.48 (95%CI 1.17-1.87); model 2 aRR 1.30 (95%CI 1.03-1.65)</li> <li>&gt;10 hours: model 1 aRR 1.27 (95%CI 0.89-1.82); model 2 aRR 1.28 (95%CI 0.82-1.69)</li> </ul> <p>Self-reported bed time before pregnancy was not associated with personal-social characteristics (21:00-24:00 reference group):</p> <ul style="list-style-type: none"> <li>24:00-03:00: model 1 aRR 0.91 (95%CI 0.78-1.07); model 2 aRR 1.18 (95%CI 0.93-1.29)</li> <li>Other: model 1 aRR 0.66 (95%CI 0.38-1.14); model 2 aRR 0.72 (95%CI 0.41-1.24)</li> </ul> <p>Self-reported sleep duration before pregnancy was not associated with total (abnormal score for any 1 of the 5 domain) (7-8 hours reference group):</p> <ul style="list-style-type: none"> <li>&lt;6 hours: model 1 aRR 1.01 (95%CI 0.94-1.10); model 2 aRR 1.01 (95%CI 0.93-1.09)</li> <li>6-7 hours: model 1 aRR 1.04 (95%CI 0.99-1.10); model 2 aRR 1.03 (95%CI 0.98-1.08)</li> <li>8-9 hours: model 1 aRR 0.98 (95%CI 0.93-1.03); model 2 aRR 0.99 (95%CI 0.95-1.05)</li> <li>9-10 hours: model 1 aRR 0.96 (95%CI 0.89-1.03); model 2 aRR 0.99 (95%CI 0.92-1.06)</li> <li>&gt;10 hours: model 1 aRR 1.00 (95%CI 0.90-1.10); model 2 aRR 1.02 (95%CI 0.92-1.13)</li> </ul> <p>Self-reported bed time before pregnancy was not associated with total (abnormal score for any 1 of the 5 domain) (21:00-24:00 reference group):</p> <ul style="list-style-type: none"> <li>24:00-03:00: model 1 aRR 1.01 (95%CI 0.97-1.05); model 2 aRR 0.98 (95%CI 0.94-1.03)</li> <li>Other: model 1 aRR 0.94 (95%CI 0.82-1.07); model 2 aRR 0.97 (95%CI 0.85-1.10)</li> </ul> |
| Okada <i>et al.</i> (2019)             | <p>Increase in morning systolic blood pressure from first to third trimester was larger in the good sleep quality group versus the poor sleep quality group (3.0 ±5.6 mmHg versus 7.1 ±7.0 mmHg, <math>p&lt;.01</math>). Same was found for evening systolic blood pressure (3.2 ±5.7 mmHg and 6.6 ±5.9 mmHg, <math>p=.00</math>).</p> <p>Change in morning systolic blood pressure from the first to the third trimester was influenced by the PSQI total score (<math>r=0.49</math>, <math>\beta=0.58</math>, <math>p=.00</math>). Sleep latency (<math>r=0.38</math>, <math>\beta=0.43</math>, <math>p=.02</math>) and sleep disturbances (<math>r=0.24</math>, <math>\beta=0.33</math>, <math>p=.04</math>) were the two most important components affecting this change. Other PSQI subscales did not reach statistical significance: subjective sleep quality (<math>r=0.33</math>; <math>\beta=0.30</math>; <math>p=.06</math>), sleep duration (<math>r=0.26</math>; <math>\beta=0.36</math>; <math>p=.06</math>), sleep efficiency (<math>r=0.37</math>; <math>\beta=0.15</math>; <math>p=.39</math>).</p>                                                                                                                                                                                                                                                                                                                                                                                                                                                                                                                                                                                                                                                                                                                                              |
| Okun <i>et al.</i> (2007)              | <p>Poorer subjective sleep quality from the PSQI in the first trimester was related to higher TNF-<math>\alpha</math> levels (<math>p=0.41</math>, <math>p=.02</math>). Associations with all other biomarkers were non-significant (IL-4, IL-6, IL-10, CRP).</p>                                                                                                                                                                                                                                                                                                                                                                                                                                                                                                                                                                                                                                                                                                                                                                                                                                                                                                                                                                                                                                                                                                                                                                                                                                                                                                                                                                                                                                                                                                                                                                                                |
| Okun <i>et al.</i> (2013) <sup>b</sup> | <p>Based on sleep diaries:</p> <ul style="list-style-type: none"> <li>NuPDQ scores (assessing pregnancy distress) did not differ between sleep deficiency groups at 10-12 weeks.</li> <li>IDS scores (assessing depressive symptoms) differed by sleep deficiency group at 10-12 weeks (<math>F_{2,157}=4.27</math>; <math>p=.01</math>), with those having sleep deficiency having higher IDS scores than those with no sleep deficiency, indicating more depressive symptoms. After adjustment, this association was no longer found.</li> </ul>                                                                                                                                                                                                                                                                                                                                                                                                                                                                                                                                                                                                                                                                                                                                                                                                                                                                                                                                                                                                                                                                                                                                                                                                                                                                                                               |

- 
- PSS scores (assessing stress) differed by sleep deficiency group at 10-12 weeks ( $F_{2,157}=3.51$ ;  $p=.03$ ), with those having sleep deficiency having higher PSS scores than those with no sleep deficiency, indicating more perceived stress. After adjustment, this association was no longer found.

Based on actigraphy:

- IDS scores (assessing depressive symptoms) did not differ between sleep deficiency groups at 10-12 weeks.
- At 10-12 weeks, NuPDQ scores (assessing pregnancy distress) differed by sleep deficiency group ( $F_{2,157}=3.96$ ;  $p=.02$ ), with those with persistent sleep deficiency having significantly higher NuPDQ scores than those with no sleep deficiency ( $p<.01$ ) or intermittent sleep deficiency ( $p=.02$ ), indicating more pregnancy distress.
- At 10-12 weeks PSS scores differed by sleep deficiency group ( $F_{2,157}=6.36$ ;  $p<.01$ ). Those with persistent sleep deficiency had higher PSS scores than those with no sleep deficiency ( $p<.01$ ) or intermittent sleep deficiency ( $p<.01-.04$ ), indicating more perceived stress. Following adjustment, differences in PSS scores among sleep deficiency groups found remained at 1-12 weeks ( $F_{2,152}=4.57$ ,  $p=.01$ ).

---

Rawal *et al.* (2017)

First-trimester sleep duration was not associated with subsequent gestational diabetes risk, raw or when covariates are adjusted for. Also not when studying nonobese and obese women separately.

All women (8-9 hours of sleep as reference group):

- 5-6 hours: crude RR 0.88 (95%CI 0.51-1.52); model 1 aRR 0.87 (95%CI 0.49-1.55); model 2 aRR 0.87 (0.49-1.54)
- 7 hours: crude RR 0.90 (95%CI 0.51-1.57); model 1 aRR 0.91 (95%CI 0.51-1.60); model 2 aRR 0.90 (95%CI 0.51-1.60)
- $\geq 10$  hours: crude RR 0.90 (95%CI 0.56-1.44); model 1 aRR 1.07 (95%CI 0.67-1.71); model 2 aRR 1.04 (95%CI 0.65-1.68)

Nonobese women (8-9 hours of sleep as reference group):

- 5-6 hours: crude RR 1.01 (95%CI 0.52-1.97); model 1 aRR 1.06 (95%CI 0.53-2.13); model 2 aRR 1.06 (95%CI 0.53-2.12)
- 7 hours: crude RR 1.08 (95%CI 0.57-2.07); model 1 aRR 1.02 (95%CI 0.52-1.98); model 2 aRR 1.02 (95%CI 0.52-1.98)
- $\geq 10$  hours: crude RR 0.92 (95%CI 0.51-1.66); model 1 aRR 1.17 (95%CI 0.64-2.14); model 2 aRR 1.09 (95%CI 0.59-2.02)

Obese women (8-9 hours of sleep as reference group):

- 5-6 hours: crude RR 0.56 (95%CI 0.21-1.45); model 1 aRR 0.60 (95%CI 0.22-1.62); model 2 aRR 0.58 (95%CI 0.22-1.56)
  - 7 hours: crude RR 0.58 (95%CI 0.18-1.88); model 1 aRR 0.70 (95%CI 0.22-2.19); model 2 aRR 0.69 (95%CI 0.22-2.15)
  - $\geq 10$  hours: crude RR 0.77 (95%CI 0.36-1.65); model 1 aRR 1.00 (95%CI 0.48-2.05); model 2 aRR 1.07 (95%CI 0.50-2.29)
-

---

|                              |                                                                                                                                                                                                                                                                                                                                                                                                                                                                                                                                                                                                                                                                                                                                                                                                                                                                                                                                                                                                                                                                                                                                                                                                                                                                                                                                                                                                                                                                                                                                                                                                                                                                                                                                                                                                        |
|------------------------------|--------------------------------------------------------------------------------------------------------------------------------------------------------------------------------------------------------------------------------------------------------------------------------------------------------------------------------------------------------------------------------------------------------------------------------------------------------------------------------------------------------------------------------------------------------------------------------------------------------------------------------------------------------------------------------------------------------------------------------------------------------------------------------------------------------------------------------------------------------------------------------------------------------------------------------------------------------------------------------------------------------------------------------------------------------------------------------------------------------------------------------------------------------------------------------------------------------------------------------------------------------------------------------------------------------------------------------------------------------------------------------------------------------------------------------------------------------------------------------------------------------------------------------------------------------------------------------------------------------------------------------------------------------------------------------------------------------------------------------------------------------------------------------------------------------|
| Sarberg <i>et al.</i> (2014) | <p>There were no differences between snorer groups regarding systolic blood pressure (<math>p=.779</math>) and diastolic blood pressure (<math>p=.053</math>) in the first trimester.</p> <p>Post hoc analyses showed that the “gestational snorers” had a significantly higher mean Epworth Sleepiness Score than the “non snorers” in the first trimester (<math>p=.009</math>), but this did not apply for the “habitual snorers” (<math>p=.264</math>).</p> <p>The prevalence of excessive daytime sleepiness (EDS) defined as Epworth Sleepiness score <math>\geq 10</math>, only differed between the groups in the first trimester of pregnancy, with significant difference between the “gestational snorers” and the “non snorers” (<math>p=.001</math>).</p> <p>Prevalence of restless legs syndrome (RLS) in the first trimester did not differ between the groups (<math>p=.147</math>).</p>                                                                                                                                                                                                                                                                                                                                                                                                                                                                                                                                                                                                                                                                                                                                                                                                                                                                                               |
| Shi <i>et al.</i> (2020)     | <p>In females, an U-shaped association was found between self-reported sleep duration and conception probability. However, not all associations were statistically significant.</p> <p>USA data (7 hours of sleep as reference group):</p> <ul style="list-style-type: none"> <li>▪ <math>\leq 5</math> hours: model 1 aRR 3.25 (95%CI 2.33-4.53); model 2 aRR 3.49 (95%CI 2.48-4.91); model 3 aRR 3.24 (95%CI 2.30-4.58)</li> <li>▪ 6 hours: model 1 aRR 2.04 (95%CI 1.51-2.75); model 2 aRR 2.17 (95%CI 1.60-2.95); model 3 aRR 2.11 (95%CI 1.55-2.86)</li> <li>▪ 8 hours: model 1 aRR 1.32 (95%CI 0.97-1.79); model 2 aRR 1.15 (95%CI 0.85-1.57); model 3 aRR 1.12 (95%CI 0.82-1.53)</li> <li>▪ <math>\geq 9</math> hours: model 1 aRR 1.32 (95%CI 0.83-2.09); model 2 aRR 0.97 (95%CI 0.60-1.56); model 3 aRR 0.93 (95%CI 0.58-1.49)</li> </ul> <p>China data (7 hours of sleep as reference group):</p> <ul style="list-style-type: none"> <li>▪ <math>\leq 6</math> hours: model 1 aRR 1.10 (95%CI 0.57-2.11); model 2 aRR 1.30 (95%CI 0.64-2.64); model 3 aRR 1.21 (95%CI 0.58-2.54)</li> <li>▪ 8 hours: model 1 aRR 1.38 (95%CI 0.95-2.02); model 2 aRR 1.15 (95%CI 0.77-1.74); model 3 aRR 1.12 (95%CI 0.73-1.70)</li> <li>▪ 9 hours: model 1 aRR 1.87 (95%CI 1.21-2.90); model 2 aRR 1.31 (95%CI 0.81-2.11); model 3 aRR 1.32 (95%CI 0.81-2.17)</li> <li>▪ <math>\geq 10</math> hours: model 1 aRR 2.49 (95%CI 1.60-3.88); model 2 aRR 1.57 (95%CI 0.96-2.57); model 3 aRR 1.63 (95%CI 0.97-2.75)</li> </ul> <p>Each hour/day difference (longer or shorter) from 7 h/day sleep was associated with 1.26 (95%CI 1.12- 1.42, <math>p&lt;.001</math>) and 1.21 (95%CI 1.03-1.41, <math>p=.019</math>) fold conception probability in the populations from the USA and China, respectively.</p> |

---

---

|                              |                                                                                                                                                                                                                                                                                                                                                                                                                                                                                                                                                                                                                                                                                                                                                                                                                                                                                                                                                                                                                                                                                                                                                                                                                                                                                                                                                                                                                                                                                                                                                                                                                                                                                                                                                                                                                                                                                                                                                                                                                                                                                                                                                                                                                                                                                                                                                                                                                                                                                                                                                                                                                                                                                                                                                                                                                                                                                                                                                                                                                                                                                                                                                                                                                                                                                                                                                                                                                                                                                                                                                                                                                                                                                                                               |
|------------------------------|-------------------------------------------------------------------------------------------------------------------------------------------------------------------------------------------------------------------------------------------------------------------------------------------------------------------------------------------------------------------------------------------------------------------------------------------------------------------------------------------------------------------------------------------------------------------------------------------------------------------------------------------------------------------------------------------------------------------------------------------------------------------------------------------------------------------------------------------------------------------------------------------------------------------------------------------------------------------------------------------------------------------------------------------------------------------------------------------------------------------------------------------------------------------------------------------------------------------------------------------------------------------------------------------------------------------------------------------------------------------------------------------------------------------------------------------------------------------------------------------------------------------------------------------------------------------------------------------------------------------------------------------------------------------------------------------------------------------------------------------------------------------------------------------------------------------------------------------------------------------------------------------------------------------------------------------------------------------------------------------------------------------------------------------------------------------------------------------------------------------------------------------------------------------------------------------------------------------------------------------------------------------------------------------------------------------------------------------------------------------------------------------------------------------------------------------------------------------------------------------------------------------------------------------------------------------------------------------------------------------------------------------------------------------------------------------------------------------------------------------------------------------------------------------------------------------------------------------------------------------------------------------------------------------------------------------------------------------------------------------------------------------------------------------------------------------------------------------------------------------------------------------------------------------------------------------------------------------------------------------------------------------------------------------------------------------------------------------------------------------------------------------------------------------------------------------------------------------------------------------------------------------------------------------------------------------------------------------------------------------------------------------------------------------------------------------------------------------------------|
| Stocker <i>et al.</i> (2020) | <p>No statistical significant differences in PSQI or ESS self-report measures between the groups.</p> <ul style="list-style-type: none"> <li>▪ PSQI subscale sleep duration (p=.48 for RM versus comparison; p=.21 for RIF versus comparison)</li> <li>▪ PSQI subscale sleep disturbance (p=.38 for RM versus comparison; p=.35 for RIF versus comparison)</li> <li>▪ PSQI subscale sleep latency (p=.69 for RM versus comparison; p=.67 for RIF versus comparison)</li> <li>▪ PSQI subscale daytime dysfunction (p=.79 for RM versus comparison; p=.50 for RIF versus comparison)</li> <li>▪ PSQI subscale sleep efficiency (p=.82 for RM versus comparison; p=.09 for RIF versus comparison)</li> <li>▪ PSQI subscale sleep quality (p=.73 for RM versus comparison; p=.49 for RIF versus comparison)</li> <li>▪ PSQI total score (p=.69 for RM versus comparison; p=.38 for RIF versus comparison)</li> <li>▪ ESS total score (p=.34 for RM versus comparison; p=.42 for RIF versus comparison)</li> </ul> <p>No statistical significant differences in sleep diary measures between the groups.</p> <ul style="list-style-type: none"> <li>▪ Awakening time (p=.61 for RM versus comparison; p=.75 for RIF versus comparison)</li> <li>▪ Out of bed time (p=.36 for RM versus comparison; p=.53 for RIF versus comparison)</li> <li>▪ Bed time (p&gt;.99 for RM versus comparison; p=.29 for RIF versus comparison)</li> <li>▪ Time fell asleep (p=.98 for RM versus comparison; p=.35 for RIF versus comparison)</li> <li>▪ Timing of naps (p=.71 for RM versus comparison; p=.26 for RIF versus comparison)</li> <li>▪ Duration of naps (p=.69 for RM versus comparison; p=.86 for RIF versus comparison)</li> <li>▪ Sleep time (p=.86 for RM versus comparison; p=.27 for RIF versus comparison)</li> <li>▪ Morning latency (p=.61 for RM versus comparison; p=.77 for RIF versus comparison)</li> <li>▪ Night time latency (p=.42 for RM versus comparison; p=.56 for RIF versus comparison)</li> </ul> <p>For the actigraphy parameters, women with RIF slept 52.72 minutes more than the control group (p=.03). All other actigraph differences were insignificant:</p> <p>Sleep:</p> <ul style="list-style-type: none"> <li>▪ Time in bed (p=.19 for RM versus comparison; p=.24 for RIF versus comparison)</li> <li>▪ Time to sleep onset (p=.32 for RM versus comparison; p=.17 for RIF versus comparison)</li> <li>▪ Sleep duration (p=.13 for RM versus comparison)</li> <li>▪ Wake after sleep onset (p=.32 for RM versus comparison; p=.51 for RIF versus comparison)</li> <li>▪ Total activity count (p=.16 for RM versus comparison; p=.61 for RIF versus comparison)</li> <li>▪ Average activity (p=.44 for RM versus comparison; p=1.00 for RIF versus comparison)</li> <li>▪ Efficiency (p=.18 for RM versus comparison; p=.80 for RIF versus comparison)</li> <li>▪ Wake time (p=.25 for RM versus comparison; p=.35 for RIF versus comparison)</li> <li>▪ Percentage awake (p=.62 for RM versus comparison; p=.67 for RIF versus comparison)</li> <li>▪ Percentage sleep (p=.62 for RM versus comparison; p=.67 for RIF versus comparison)</li> </ul> <p>Wake:</p> <ul style="list-style-type: none"> <li>▪ Activity duration (p=.62 for RM versus comparison; p=.92 for RIF versus comparison)</li> <li>▪ Total activity count (p=.80 for RM versus comparison; p=.49 for RIF versus comparison)</li> <li>▪ Activity count/minute (p=.96 for RM versus comparison; p=.84 for RIF versus comparison)</li> <li>▪ Sleep time (p=.46 for RM versus comparison; p=.59 for RIF versus comparison)</li> <li>▪ Percentage sleep (p=.93 for RM versus comparison; p=.79 for RIF versus comparison)</li> </ul> |
|------------------------------|-------------------------------------------------------------------------------------------------------------------------------------------------------------------------------------------------------------------------------------------------------------------------------------------------------------------------------------------------------------------------------------------------------------------------------------------------------------------------------------------------------------------------------------------------------------------------------------------------------------------------------------------------------------------------------------------------------------------------------------------------------------------------------------------------------------------------------------------------------------------------------------------------------------------------------------------------------------------------------------------------------------------------------------------------------------------------------------------------------------------------------------------------------------------------------------------------------------------------------------------------------------------------------------------------------------------------------------------------------------------------------------------------------------------------------------------------------------------------------------------------------------------------------------------------------------------------------------------------------------------------------------------------------------------------------------------------------------------------------------------------------------------------------------------------------------------------------------------------------------------------------------------------------------------------------------------------------------------------------------------------------------------------------------------------------------------------------------------------------------------------------------------------------------------------------------------------------------------------------------------------------------------------------------------------------------------------------------------------------------------------------------------------------------------------------------------------------------------------------------------------------------------------------------------------------------------------------------------------------------------------------------------------------------------------------------------------------------------------------------------------------------------------------------------------------------------------------------------------------------------------------------------------------------------------------------------------------------------------------------------------------------------------------------------------------------------------------------------------------------------------------------------------------------------------------------------------------------------------------------------------------------------------------------------------------------------------------------------------------------------------------------------------------------------------------------------------------------------------------------------------------------------------------------------------------------------------------------------------------------------------------------------------------------------------------------------------------------------------------|

---

|                             |                                                                                                                                                                                                                                                                                                                                                                                                                                                                                                                                                                                                                                                                                                                                                                                                                                                                                                                                                                                                                                                                                                                                                                                                                                                                                                                                                                                                                                                                                                                                                                                                                                                                                                                                                                                                                                                                                                                                                                                                                                                                                                                                                                                                                                                                                                                                                                                                                                                                                                                                                                                                                                                                                                                                                                                                                                                                                                                                                                                                                                                                                                                                                                                                                                                                                                                                                                                                                                                                                                                           |
|-----------------------------|---------------------------------------------------------------------------------------------------------------------------------------------------------------------------------------------------------------------------------------------------------------------------------------------------------------------------------------------------------------------------------------------------------------------------------------------------------------------------------------------------------------------------------------------------------------------------------------------------------------------------------------------------------------------------------------------------------------------------------------------------------------------------------------------------------------------------------------------------------------------------------------------------------------------------------------------------------------------------------------------------------------------------------------------------------------------------------------------------------------------------------------------------------------------------------------------------------------------------------------------------------------------------------------------------------------------------------------------------------------------------------------------------------------------------------------------------------------------------------------------------------------------------------------------------------------------------------------------------------------------------------------------------------------------------------------------------------------------------------------------------------------------------------------------------------------------------------------------------------------------------------------------------------------------------------------------------------------------------------------------------------------------------------------------------------------------------------------------------------------------------------------------------------------------------------------------------------------------------------------------------------------------------------------------------------------------------------------------------------------------------------------------------------------------------------------------------------------------------------------------------------------------------------------------------------------------------------------------------------------------------------------------------------------------------------------------------------------------------------------------------------------------------------------------------------------------------------------------------------------------------------------------------------------------------------------------------------------------------------------------------------------------------------------------------------------------------------------------------------------------------------------------------------------------------------------------------------------------------------------------------------------------------------------------------------------------------------------------------------------------------------------------------------------------------------------------------------------------------------------------------------------------------|
|                             | <p>Rest:</p> <ul style="list-style-type: none"> <li>Rest duration (<math>p=.12</math> for RM versus comparison; <math>p=.12</math> for RIF versus comparison)</li> <li>Total activity count (<math>p=.14</math> for RM versus comparison; <math>p=.49</math> for RIF versus comparison)</li> <li>Activity count/minute (<math>p=.39</math> for RM versus comparison; <math>p=.82</math> for RIF versus comparison)</li> </ul>                                                                                                                                                                                                                                                                                                                                                                                                                                                                                                                                                                                                                                                                                                                                                                                                                                                                                                                                                                                                                                                                                                                                                                                                                                                                                                                                                                                                                                                                                                                                                                                                                                                                                                                                                                                                                                                                                                                                                                                                                                                                                                                                                                                                                                                                                                                                                                                                                                                                                                                                                                                                                                                                                                                                                                                                                                                                                                                                                                                                                                                                                             |
| Tsai <i>et al.</i> (2016)   | <p>Cross-sectionally, more daytime sleep (<math>\beta=0.03</math>; <math>p=.04</math>) and higher PSQI total score (<math>\beta=-1.07</math>; <math>p&lt;.01</math>) in the first trimester were associated with better physical health-related quality of life. Sleep efficiency (<math>\beta=-0.01</math>; <math>p=.93</math>), wake after sleep onset (<math>\beta=0.01</math>; <math>p=.85</math>), and total nighttime sleep (<math>\beta=-0.81</math>; <math>p=.30</math>) in the first trimester were not associated with better physical health-related quality of life.</p> <p>Cross-sectionally, higher PSQI total score (<math>\beta=-1.40</math>; <math>p&lt;.01</math>) in the first trimester was associated with better mental health-related quality of life. Total daytime sleep (<math>\beta=0.02</math>; <math>p=.46</math>), sleep efficiency (<math>\beta=-0.01</math>; <math>p=.95</math>), wake after sleep onset (<math>\beta=0.01</math>; <math>p=.83</math>), and total nighttime sleep (<math>\beta=0.46</math>; <math>p=.64</math>) in the first trimester were not associated with better mental health-related quality of sleep.</p> <p>Longitudinally, total nighttime sleep (<math>\beta=1.38</math>; <math>p=.01</math>) and higher total PSQI score (<math>\beta=-0.85</math>; <math>p&lt;.01</math>) in the first trimester predicted better mental health-related quality of life in the second trimester. Total daytime sleep (<math>\beta=-0.01</math>; <math>p=.36</math>), sleep efficiency (<math>\beta=-0.09</math>; <math>p=.52</math>), and wake after onset (<math>\beta=-0.05</math>; <math>p=.12</math>) in the first trimester did not predict better mental health-related quality of life in the second trimester.</p> <p>Longitudinally, higher total PSQI score (<math>\beta=-0.87</math>; <math>p&lt;.01</math>) in the first trimester predicted better physical health-related quality of life in the second trimester. Total daytime sleep (<math>\beta=0.01</math>; <math>p=.55</math>), sleep efficiency (<math>\beta=-0.10</math>; <math>p=.47</math>), wake after sleep onset (<math>\beta=-0.02</math>; <math>p=.56</math>), and total nighttime sleep (<math>\beta=-0.12</math>; <math>p=.87</math>) in the first trimester did not predict better mental health-related quality of life in the second trimester.</p> <p>Longitudinally, longer total nighttime sleep (<math>\beta=1.53</math>; <math>p=.02</math>) and higher total PSQI score (<math>\beta=-1.00</math>; <math>p&lt;.01</math>) in the first trimester predicted better mental health-related quality of life in the third trimester. Total daytime sleep (<math>\beta=0.01</math>; <math>p=.43</math>), sleep efficiency (<math>\beta=0.07</math>; <math>p=.62</math>), and wake after onset (<math>\beta=-0.03</math>; <math>p=.39</math>) in the first trimester did not predict better mental health-related quality of life in the third trimester.</p> <p>Longitudinally, wake after sleep onset (<math>\beta=-0.07</math>; <math>p=.05</math>) predicted better physical health-related quality of life. Total PSQI score (<math>\beta=-0.20</math>; <math>p=.41</math>), total daytime sleep (<math>\beta=-0.01</math>; <math>p=.59</math>), sleep efficiency (<math>\beta=-0.27</math>; <math>p=.06</math>), and total nighttime sleep (<math>\beta=-0.13</math>; <math>p=.86</math>) in the first trimester did not predict better physical health-related quality of life.</p> |
| Willis <i>et al.</i> (2019) | <p>Shorter self-reported sleep duration (&lt;6 hours) was associated with lower fecundability, but not after adjustment for confounders.</p> <p>Associations between sleep duration and fecundability rate (8 hours of sleep as reference group):</p> <ul style="list-style-type: none"> <li>&lt;6 hours: crude FR 0.60 (95%CI 0.67-0.94); aFR 0.89 (95%CI 0.75-1.06)</li> <li>6 hours: crude FR 0.89 (95%CI 0.81-0.98); aFR 0.95 (95%CI 0.86-1.04)</li> <li>7 hours: crude FR 0.98 (95%CI 0.91-1.05); aFR 0.99 (95%CI 0.92-1.06)</li> <li><math>\geq 9</math> hours: crude FR 0.91 (95%CI 0.80-1.03); aFR 0.96 (95%CI 0.84-1.10)</li> </ul> <p>More self-reported sleeping problems were associated with lower fecundability rate (no problems as reference group):</p>                                                                                                                                                                                                                                                                                                                                                                                                                                                                                                                                                                                                                                                                                                                                                                                                                                                                                                                                                                                                                                                                                                                                                                                                                                                                                                                                                                                                                                                                                                                                                                                                                                                                                                                                                                                                                                                                                                                                                                                                                                                                                                                                                                                                                                                                                                                                                                                                                                                                                                                                                                                                                                                                                                                                                  |

- 
- For <50% of the time: crude FR 0.91 (95%CI 0.86-0.97); aFR 0.93 (95%CI 0.88-1.00).
  - For >50% of the time: crude FR 0.80 (95%CI 0.73-0.87); aFR 0.87 (95%CI 0.79-0.95).

Restricted to women with partner data available, this did not change the findings (8 hours of sleep as reference group):

- <6 hours: crude FR 0.78 (95%CI 0.56-1.08); model 1 aFR 1.00 (95%CI 0.71-1.41); model 2 aFR 1.01 (95%CI 0.71-1.42)
- 6 hours: crude FR 0.80 (95%CI 0.68-0.95); model 1 aFR 0.85 (95%CI 0.72-1.02); model 2 aFR 0.86 (95%CI 0.71-1.03)
- 7 hours: crude FR 0.95 (95%CI 0.84-1.08); model 1 aFR 0.94 (95%CI 0.83-1.07); model 2 aFR 0.94 (95%CI 0.83-1.07)
- ≥9 hours: crude FR 0.82 (95%CI 0.65-0.98); model 1 aFR 0.86 (95%CI 0.67-1.09); model 2 aFR 0.86 (95%CI 0.67-1.09)

Similar to self-reported sleeping problems. Restricted to women with partner available data, more self-reported sleeping problems remained associated with lower fecundability rate (no problems as reference group):

- For <50% of the time: crude FR 0.89 (95%CI 0.79-1.00); model 1 aFR 0.92 (95%CI 0.82-1.04); model 2 aFR 0.93 (95%CI 0.82-1.04).
- For >50 of the time: crude FR 0.76 (95%CI 0.64-0.90); model 1 aFR 0.83 (95%CI 0.69-0.99); model 2 aFR 0.83 (95%CI 0.70-1.00).

---

Yu *et al.* (2017)

Cross-sectionally, sleep duration in the first trimester was associated with depressive symptoms ( $\beta=-0.28$ ; SE=0.08;  $p<.01$ ) and anxiety symptoms ( $\beta=-0.33$ ; SE=0.07;  $p<.01$ ).

In cross-sectional analysis, women who slept <8 hours per day had higher risk of depression (OR 1.75; 95%CI 1.39-2.20) and anxiety (OR 2.00, 95%CI 1.57-2.55) in the first trimester.

Also, women who reported to have a fair a bad sleep quality had a higher risk of depression or anxiety in the first trimester.

- Fair: OR 1.57 (95%CI 1.34-1.84) for depression and OR 2.52 (95%CI 2.06-3.09) for anxiety.
- Bad: OR 3.27 (95%CI 2.28-4.32) for depression and OR 7.39 (95%CI 5.89-10.67) for anxiety.

---

Yun *et al.* (2021)

Self-reported insufficient sleep before pregnancy and at 12 weeks were statistically significantly associated with postpartum depression at 4 weeks (respectively, OR 1.37 (95%CI 1.07-1.75);  $p=0.013$ , and OR 1.43 (95%CI 1.11-1.83);  $p=0.005$ ). This was not the case after adjusting for covariates.

---

<sup>a</sup> Facco *et al.* (2018) and Facco *et al.* (2019) analysed the same study population; <sup>b</sup> Haney *et al.* (2014) and Okun *et al.* (2013) studied the same study population; <sup>c</sup> Nakahara (2020) and (2021) studied the same population.

AIS = Athens Insomnia Scale; BMI = body mass index; ESS = Epworth Sleepiness Scale; PSQI = Pittsburgh Sleep Quality Index.



**Figure S1.** Risk of bias assessment per study, based on the ErasmusAGE (N=27).

| Studies                          | Study design | Study size | Exposure assessment | Outcome assessment | Adjustment |
|----------------------------------|--------------|------------|---------------------|--------------------|------------|
| Bublitz <i>et al.</i> (2010)     | Yellow       | Yellow     | Green               | Green              | Green      |
| Chang <i>et al.</i> (2015)       | Red          | Red        | Green               | Green              | Red        |
| Doyon <i>et al.</i> (2020)       | Yellow       | Green      | Yellow              | Yellow             | Yellow     |
| Facco <i>et al.</i> (2018)       | Yellow       | Green      | Green               | Green              | Green      |
| Facco <i>et al.</i> (2019)       | Yellow       | Green      | Green               | Green              | Green      |
| Franco-Sena <i>et al.</i> (2018) | Yellow       | Yellow     | Green               | Green              | Green      |
| Gelaye <i>et al.</i> (2015)      | Red          | Green      | Green               | Green              | Green      |
| Georgiou <i>et al.</i> (2019)    | Yellow       | Red        | Green               | Green              | Red        |
| Haney <i>et al.</i> (2014)       | Yellow       | Yellow     | Green               | Green              | Yellow     |
| Hill <i>et al.</i> (2020)        | Yellow       | Yellow     | Green               | Green              | Red        |
| Liu <i>et al.</i> (2019)         | Yellow       | Green      | Green               | Green              | Green      |
| Lyu <i>et al.</i> (2020)         | Yellow       | Green      | Red                 | Green              | Green      |
| Marinelli <i>et al.</i> (2021)   | Yellow       | Green      | Yellow              | Green              | Green      |
| Matsuo <i>et al.</i> (2021)      | Yellow       | Green      | Green               | Green              | Green      |
| Nakahara <i>et al.</i> (2020)    | Yellow       | Green      | Yellow              | Yellow             | Green      |
| Nakahara <i>et al.</i> (2021)    | Yellow       | Green      | Green               | Green              | Green      |
| Okada <i>et al.</i> (2019)       | Yellow       | Red        | Green               | Yellow             | Yellow     |
| Okun <i>et al.</i> (2007)        | Yellow       | Red        | Green               | Green              | Yellow     |
| Okun <i>et al.</i> (2013)        | Yellow       | Yellow     | Green               | Green              | Green      |
| Rawal <i>et al.</i> (2017)       | Yellow       | Green      | Yellow              | Green              | Green      |
| Sarberg <i>et al.</i> (2014)     | Yellow       | Yellow     | Yellow              | Green              | Red        |
| Shi <i>et al.</i> (2020)         | Yellow       | Green      | Yellow              | Yellow             | Green      |
| Stocker <i>et al.</i> (2020)     | Yellow       | Red        | Green               | Green              | Red        |
| Tsai <i>et al.</i> (2016)        | Yellow       | Yellow     | Green               | Green              | Yellow     |
| Willis <i>et al.</i> (2019)      | Yellow       | Green      | Yellow              | Green              | Green      |
| Yu <i>et al.</i> (2017)          | Yellow       | Green      | Yellow              | Green              | Yellow     |
| Yun <i>et al.</i> (2021)         | Yellow       | Green      | Yellow              | Green              | Yellow     |

Green = low risk of bias; yellow = unclear/moderate risk of bias; red = high risk of bias.

**Figure S2.** Risk of bias assessment per criterion, based on the ErasmusAGE (N=27).

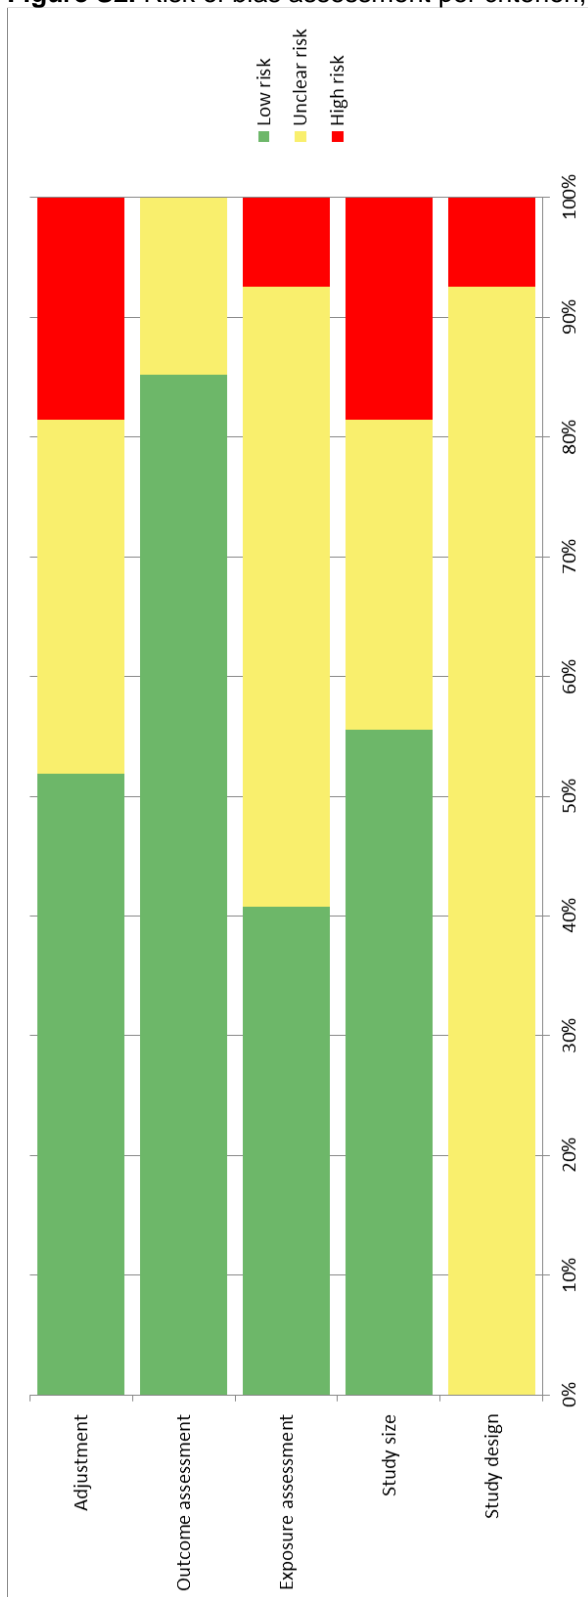

This figure shows a summary of the risk of bias assessment per article, shown in Figure S1. Green = low risk of bias; yellow = unclear/moderate risk of bias; red = high risk of bias.
